# Supplementary material for: 2D perovskite microsheets for high-performance photodetectors
Source: Royal Society of Chemistry journal article supplement (doi:10.1039/c9tc00138g), 2019-01-01
Supplement: c9tc00138g1.pdf [file c9tc00138g1.pdf]

## Supporting Information

### 2D Perovskite Microsheets for High-Performance Photodetectors

Liu Qian,<sup>a,b,c</sup> Yilin Sun,<sup>d</sup> Mengxing Sun,<sup>d</sup> Zhimin Fang,<sup>a</sup> Lin Li,<sup>a</sup> Dan Xie,<sup>\*d</sup> Chun Li<sup>\*c</sup> and Liming Ding<sup>\*a,b</sup>

<sup>a</sup>*Center for Excellence in Nanoscience, Key Laboratory of Nanosystem and Hierarchical Fabrication (CAS), National Center for Nanoscience and Technology, Beijing 100190, China. E-mail: ding@nanoctr.cn*

<sup>b</sup>*University of Chinese Academy of Sciences, Beijing 100049, China.*

<sup>c</sup>*Department of Chemistry, Key Laboratory of Bioorganic Phosphorus Chemistry & Chemical Biology (MOE), Tsinghua University, Beijing 100084, China. E-mail: chunli@mail.tsinghua.edu.cn*

<sup>d</sup>*Tsinghua National Laboratory for Information Science and Technology (TNList), Institute of Microelectronics, Tsinghua University, Beijing 100084, China. E-mail: xiedan@tsinghua.edu.cn*

## Experimental Section

### Preparation of 2D perovskite microsheets

(PEA)I and (PEA)Br was prepared according to a previous literature.<sup>[14]</sup> The (PEA)X (X=I or Br) and SnI<sub>2</sub> (Acros, 99.999%) with a mole ratio of 2:1 was dissolved in N,N-dimethylformamide (DMF) (Acros, 99.9%) and stirred for at least 3 h in a glovebox filled with argon gas. The concentration of the solution was controlled to be 0.5 mol L<sup>-1</sup>. The solution was then diluted 100 times by a DMF/chlorobenzene (1:1 volume ratio) co-solvent. Then, the diluted solution was further diluted by CB/acetonitrile (2:1 volume ratio) co-solvent to the concentration of 0.025 mmol L<sup>-1</sup>, 0.05 mmol L<sup>-1</sup>, 0.075 mmol L<sup>-1</sup> or 0.1 mmol L<sup>-1</sup>. Si/SiO<sub>2</sub> substrates were cleaned ultrasonically in acetone, ethanol, and isopropyl alcohol for 20 min sequentially, dried by N<sub>2</sub>-flow and followed by a 15 min UV-ozone treatment. The substrates were then transferred into the glove box and preheated at a certain temperature (60°C, 70°C, 80°C, 90°C, 100°C) on a hot plate. 10 μL of the diluted solution was dropped onto the Si/SiO<sub>2</sub> surface and dried on the hot plate.

### Device fabrication and measurements

60 nm Au electrodes were thermal evaporated (pressure  $\leq 10^{-4}$  Pa) onto the as prepared samples with a copper grid shadow mask. The rib width of the copper grid is 6 μm. The device performance was studied on Summit 11000 AP probe station (CASCADE microtech) equipped with a B1500A Semiconductor Device Analyzer (Agilent Technologies).

### Characterization

X-ray diffraction (XRD) patterns were recorded on Bruker D8 ADVANCE diffractometer (Cu K<sub>α</sub> radiation,  $\lambda = 1.5406$  Å). UV-vis absorption spectra were taken out from a Lambda 35 UV-vis spectrometer (PerkinElmer). Steady-state photoluminescence (PL) was measured on a LabRAM HR Evolution (Horiba Jobin

Yvon) Raman spectrometer with a 532-nm laser. Scanning electron microscopy (SEM) images were obtained on a Sirion-200 field-emission scanning electron microscope (FEI). Atomic force microscopy images were carried out by the use of Bruker Dimension Icon microscope. Optical microscopy images were obtained on Olympus BX 51M optical microscope.

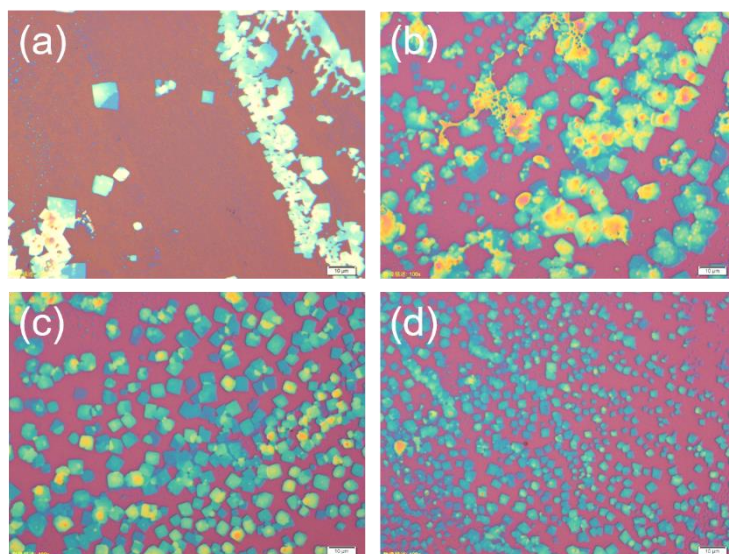

**Fig. S1** Optical microscopy images of  $(\text{PEA})_2\text{SnI}_4$  microsheets grown at 70°C (a), 80°C (b), 90°C (c), 100°C (d). Scale bar: 10 µm.

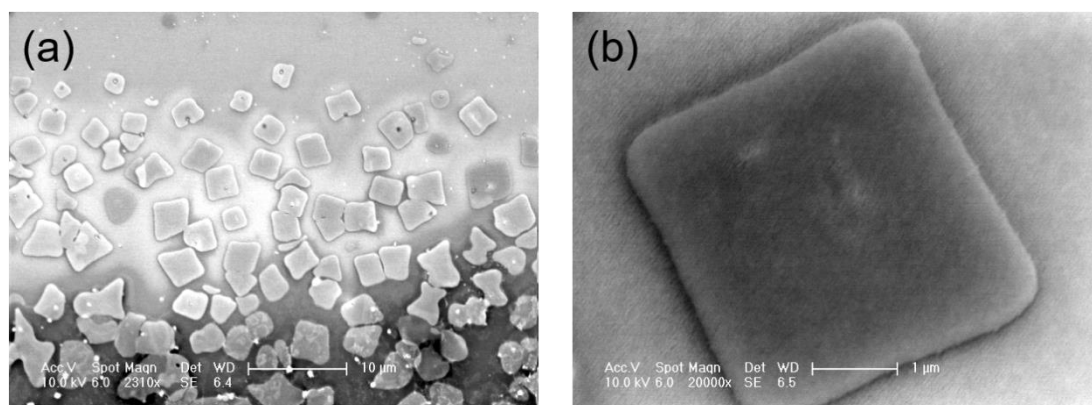

**Fig. S2** SEM images of  $(\text{PEA})_2\text{SnI}_4$  microsheets.

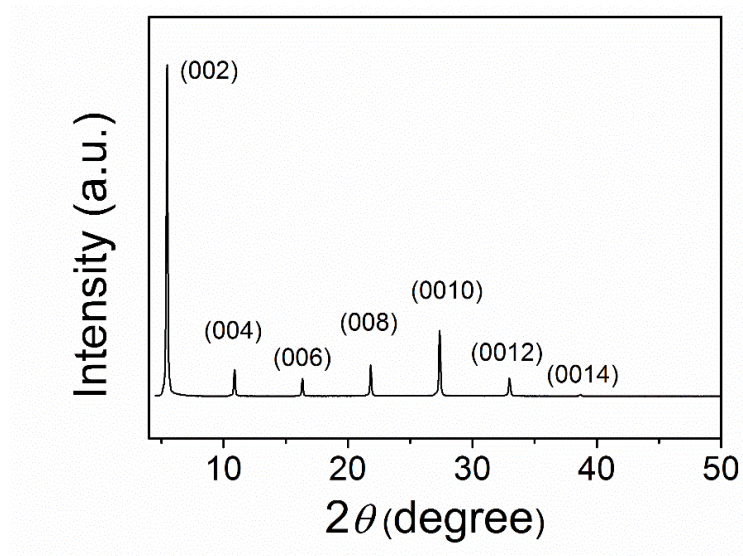

**Fig. S3** XRD pattern of  $(\text{PEA})_2\text{SnI}_4$  microsheets.

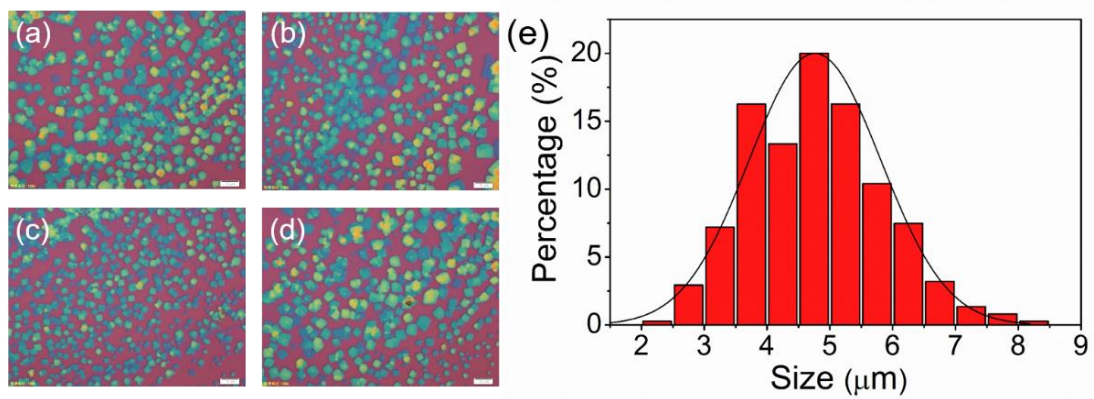

**Fig. S4** (a-d) Optical microscopy images of  $(\text{PEA})_2\text{SnI}_4$  microsheets. Scale bar: 10  $\mu\text{m}$ .

(e) Statistics of lateral size.

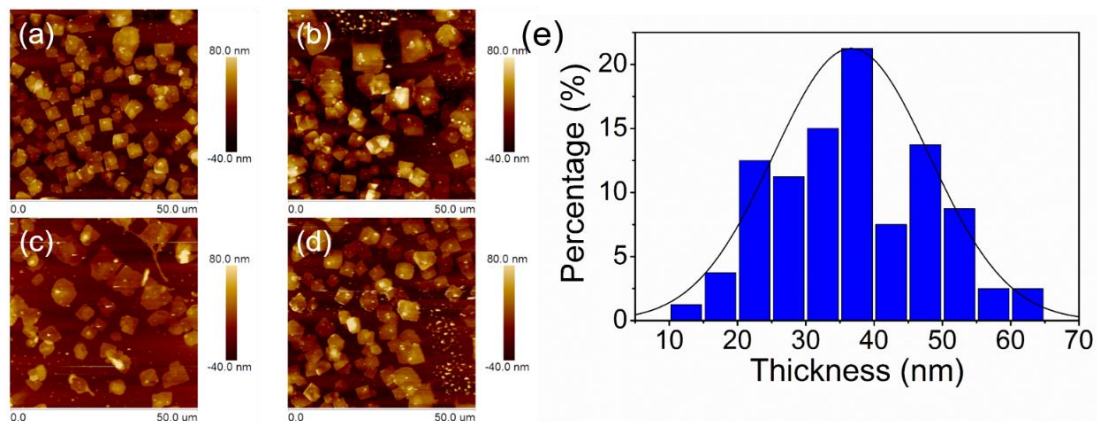

**Fig. S5** (a-d) AFM images of (PEA)<sub>2</sub>SnI<sub>4</sub> microsheets; (e) statistics of thickness.

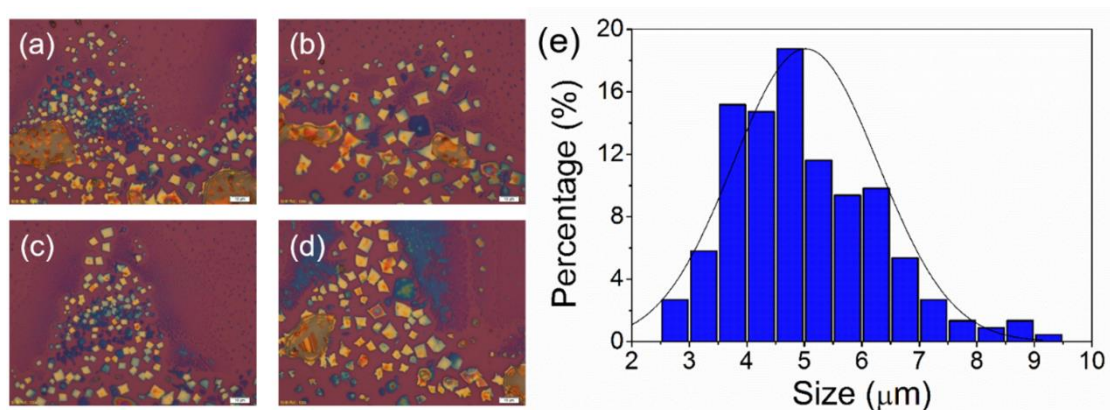

**Fig. S6** (a-d) Optical microscopy images of (PEA)<sub>2</sub>SnI<sub>3</sub>Br microsheets. Scale bar: 10 μm. (e) Statistics of lateral size.

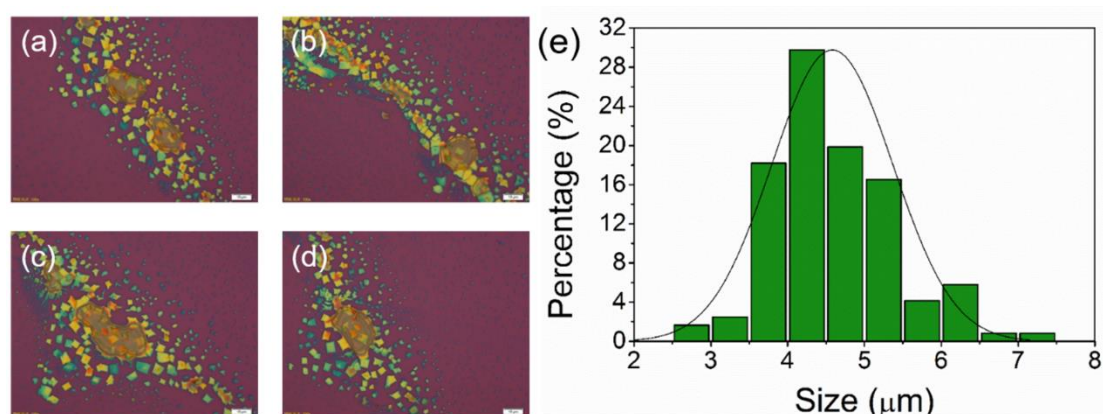

**Fig. S7** (a-d) Optical microscopy images of (PEA)<sub>2</sub>SnI<sub>2</sub>Br<sub>2</sub> microsheets. Scale bar: 10 μm. (e) Statistics of lateral size.

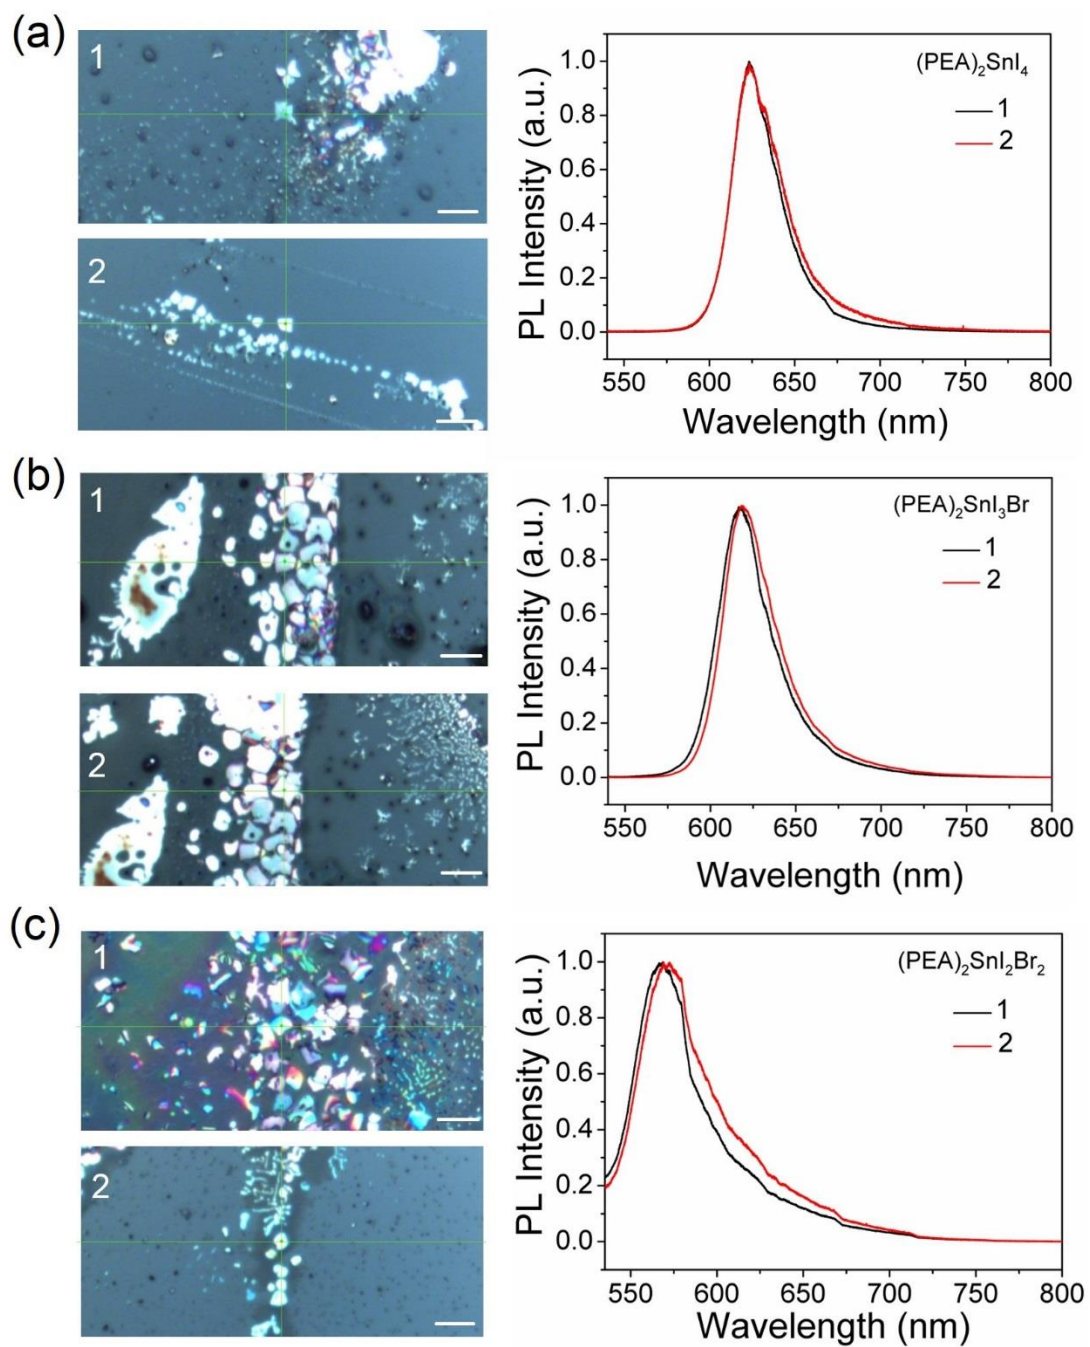

**Fig. S8** Optical microscopy images and PL spectra for  $(\text{PEA})_2\text{SnI}_4$  (a),  $(\text{PEA})_2\text{SnI}_3\text{Br}$  (b), and  $(\text{PEA})_2\text{SnI}_2\text{Br}_2$  (c) microsheets. Scale bar: 10  $\mu\text{m}$ .

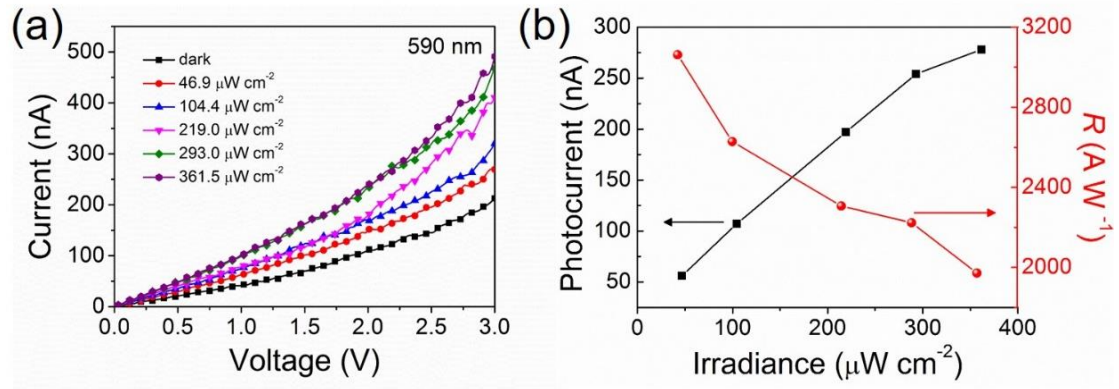

**Fig. S9** (a)  $I$ - $V$  curves of (PEA)<sub>2</sub>SnI<sub>4</sub> device under dark and irradiation with different intensity (590 nm). (b) Irradiance dependence of photocurrent and photoresponsivity for (PEA)<sub>2</sub>SnI<sub>4</sub> device at 3 V bias (590 nm).

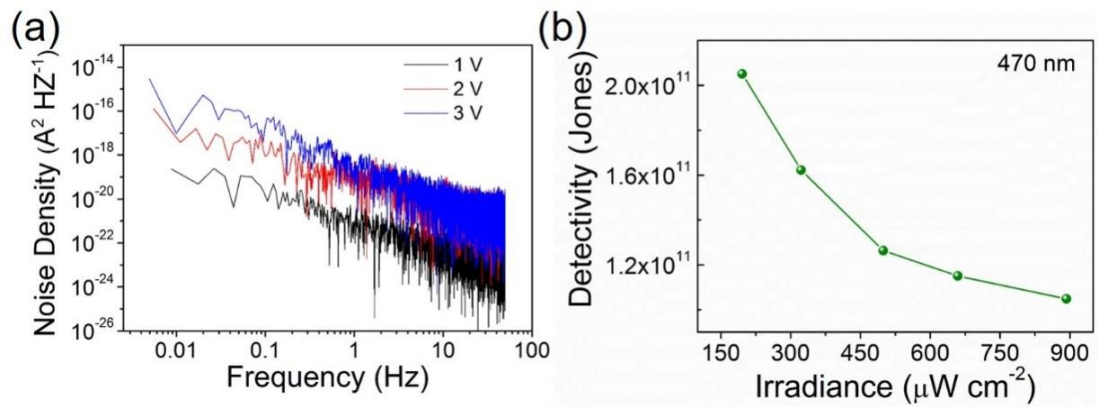

**Fig. S10** (a) Noise analysis for (PEA)<sub>2</sub>SnI<sub>4</sub> device under different bias. The noise density was obtained from the Fast Fourier Transform of the dark current versus time. (b) Irradiance dependence of detectivity of (PEA)<sub>2</sub>SnI<sub>4</sub> device at 3 V bias (470 nm).

Sn perovskite device gave noise current ( $I_n$ ) of  $\sim 10$  pA Hz<sup>-1/2</sup> at high frequencies.<sup>1</sup> Specific detectivity ( $D^*$ ) was calculated by using the equation  $D^* = S^{1/2}/NEP = S^{1/2}/(I_n/R)$ , where NEP is the noise equivalent power,  $I_n$  is the noise current (A Hz<sup>-1/2</sup>),  $S$  is the effective area of the device,  $R$  is the photoresponsivity of the device.



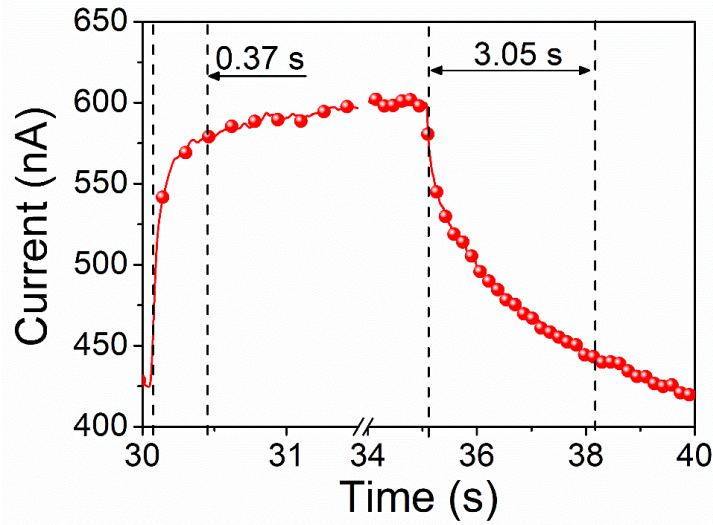

**Fig. S11** An enlarged view of the temporal photocurrent response during on-off illumination switching with 5 s interval.

**Table S1** The photoresponsivity comparison between pure perovskite photodetectors.

| materials                                                                                                                                             | device structures                   | photoresponsivity<br>(A W <sup>-1</sup> ) | references |
|-------------------------------------------------------------------------------------------------------------------------------------------------------|-------------------------------------|-------------------------------------------|------------|
| CH <sub>3</sub> NH <sub>3</sub> PbI <sub>3</sub> film                                                                                                 | phototransistor                     | 320                                       | [2]        |
| (C <sub>4</sub> H <sub>9</sub> NH <sub>3</sub> ) <sub>2</sub> (CH <sub>3</sub> NH <sub>3</sub> ) <sub>2</sub> Pb <sub>3</sub> I <sub>10</sub><br>film | two-electrode<br>photodetectors     | 12.78×10 <sup>-3</sup>                    | [3]        |
| CH <sub>3</sub> NH <sub>3</sub> PbI <sub>3</sub> 2D nanocrystal                                                                                       | phototransistor                     | 12                                        | [4]        |
| (PEA) <sub>2</sub> SnI <sub>4</sub> film                                                                                                              | phototransistor                     | 1.9×10 <sup>4</sup>                       | [5]        |
| (PEA) <sub>2</sub> PbBr <sub>4</sub> 2D crystal                                                                                                       | interdigital<br>graphene electrodes | 2100                                      | [6]        |
| (PEA) <sub>2</sub> SnI <sub>4</sub> microsheet                                                                                                        | photoconductor                      | 3290                                      | This work  |

## References

- [1] Q. Lin, A. Armin, P. L. Burn and P. Meredith, *Nat. Photon.*, 2015, **9**, 687.
- [2] F. Li, C. Ma, H. Wang, W. Hu, W. Yu, A. D. Sheikh and T. Wu, *Nat. Commun.*, 2015, **6**, 8238.
- [3] J. Zhou, Y. Chu and J. Huang, *ACS Appl. Mater. Interfaces*, **2016**, 8, 25660.
- [4] J. Liu, Y. Xue, Z. Wang, Z. -Q. Xu, C. Zheng, B. Weber, J. Song, Y. Wang, Y. Lu, Y. Zhang and Q. Bao, *ACS Nano*, **2016**, 10, 3536.
- [5] C. Chen, X. Zhang, G. Wu, H. Li and H. Chen, *Adv. Optical Mater.*, 2017, **5**, 1600539.
- [6] Z. Tan, Y. Wu, H. Hong, J. Yin, J. Zhang, L. Lin, M. Wang, X. Sun, L. Sun, Y. Huang, K. Liu, Z. Liu and H. Peng, *J. Am. Chem. Soc.*, **2016**, 138, 16612.
